# Supplementary material for: Hydrostannylation of carbon dioxide by a hydridostannylene molybdenum complex
Source: Royal Society of Chemistry journal article supplement (doi:10.1039/d1dt02473f), 2021-01-01
Supplement: d1dt02473f3.pdf [file d1dt02473f3.pdf]

## Electronic Supplementary Information

# Hydrostannylation of Carbon Dioxide by a Hydridostannylene Molybdenum Complex

Qihao Zhu, James C. Fettinger, and Philip P. Power\*

Department of Chemistry, University of California, Davis, California 95616, United States

### Table of contents

|     |                                                                                                                                                 |     |
|-----|-------------------------------------------------------------------------------------------------------------------------------------------------|-----|
| 1.  | Computational details for <b>1</b> .                                                                                                            | S2  |
| 2.  | <b>Table S1</b> . Experimental and Calculated Bond Lengths and Bond Angles of <b>1</b> .                                                        | S2  |
| 3.  | <b>Table S2</b> . Calculated CO stretching frequencies(scaled) for <b>1</b> .                                                                   | S2  |
| 4.  | <b>Figure S1</b> . Calculated IR spectrum of <b>1</b> .                                                                                         | S3  |
| 5.  | <b>Table S3</b> . Selected X-ray Crystallographic data for <b>1-3</b> .                                                                         | S3  |
| 6.  | <b>Figure S2</b> . $^1\text{H}$ NMR spectrum of <b>1</b> in $\text{C}_6\text{D}_6$ at 298K.                                                     | S5  |
| 7.  | <b>Figure S3</b> . $^{13}\text{C}\{^1\text{H}\}$ NMR spectrum of <b>1</b> in $\text{C}_6\text{D}_6$ at 298K.                                    | S5  |
| 8.  | <b>Figure S4</b> . $^{119}\text{Sn}\{^1\text{H}\}$ NMR spectrum of <b>1</b> in $\text{C}_6\text{D}_6$ at 298K.                                  | S6  |
| 9.  | <b>Figure S5</b> . $^{119}\text{Sn}$ NMR spectrum of <b>1</b> in $\text{C}_6\text{D}_6$ at 298K.                                                | S6  |
| 10. | <b>Figure S6</b> . $^1\text{H}$ NMR spectrum of <b>2</b> in $\text{C}_6\text{D}_6$ at 298K.                                                     | S7  |
| 11. | <b>Figure S7</b> . $^{13}\text{C}\{^1\text{H}\}$ NMR spectrum of <b>2</b> in $\text{C}_6\text{D}_6$ at 298K.                                    | S7  |
| 12. | <b>Figure S8</b> . $^{119}\text{Sn}\{^1\text{H}\}$ NMR spectrum of <b>2</b> in $\text{C}_6\text{D}_6$ at 298K.                                  | S8  |
| 13. | <b>Figure S9</b> . $^1\text{H}$ NMR spectrum of <b>3</b> in $\text{C}_6\text{D}_6$ at 298K.                                                     | S8  |
| 14. | <b>Figure S10</b> . $^{13}\text{C}\{^1\text{H}\}$ NMR spectrum of <b>3</b> in $\text{C}_6\text{D}_6$ at 298K.                                   | S9  |
| 15. | <b>Figure S11</b> . $^{119}\text{Sn}\{^1\text{H}\}$ NMR spectrum of <b>3</b> in $\text{C}_6\text{D}_6$ at 298K.                                 | S9  |
| 16. | <b>Figure S12</b> . $^1\text{H}$ NMR spectrum of <b>3</b> with HBpin (3 hours after mixing) in $\text{C}_6\text{D}_6$ at 298K.                  | S10 |
| 17. | <b>Figure S13</b> . $^{11}\text{B}\{^1\text{H}\}$ NMR spectrum of <b>3</b> with HBpin (3 hours after mixing) in $\text{C}_6\text{D}_6$ at 298K. | S10 |
| 18. | <b>Figure S14</b> . $^{11}\text{B}$ NMR spectrum of <b>3</b> with HBpin (3 hours after mixing) in $\text{C}_6\text{D}_6$ at 298K.               | S11 |
| 19. | <b>Figure S15</b> . UV-vis spectrum of <b>1</b> in hexanes at 298K.                                                                             | S11 |
| 20. | <b>Figure S16</b> . UV-vis spectrum of <b>2</b> in hexanes at 298K.                                                                             | S12 |
| 21. | <b>Figure S17</b> . UV-vis spectrum of <b>3</b> in hexanes at 298K.                                                                             | S12 |
| 22. | <b>Figure S18</b> . ATR-FTIR spectrum of <b>1</b> at 298K.                                                                                      | S13 |
| 23. | <b>Figure S19</b> . ATR-FTIR spectrum of <b>2</b> at 298K.                                                                                      | S13 |
| 24. | <b>Figure S20</b> . ATR-FTIR spectrum of <b>3</b> at 298K.                                                                                      | S14 |

25. **Figure S21.** Photo of addition HBpin into **3** in C<sub>6</sub>D<sub>6</sub> at 298K. S15
26. **Figure S21.** Photo of addition HBpin into **3** (3 hours after mixing) in C<sub>6</sub>D<sub>6</sub> at 298K. S15
27. References S15

### Computational details.

The structure was subjected to refinement at the DFT level of theory, with the B3LYP hybrid exchange functional<sup>1-4</sup> using Ahlrichs polarized basis set def2-TZVP<sup>5</sup>. For Sn, the effective core potential (ECP) basis set<sup>6</sup> with similar valence quality was used. In addition, dispersion correction with Becke-Johnson damping (D3BJ)<sup>7</sup>,<sup>8</sup> was used. The resolution of identity approximation was employed with auxiliary basis set def2-TZVP/C<sup>9,10</sup> in order to speed up the calculations. Phenyl was used in substitution of Ar<sup>iPr6</sup> in the calculation of IR frequencies to speed up calculation. The reported IR frequencies are scaled by 0.986 as suggested by Truhlar. All calculations were carried out using the ORCA 4.2.1 quantum chemistry package.<sup>11</sup>

**Table S1.** Experimental and Calculated Bond Lengths and Bond Angles of **1**

| Compound <b>1</b> | Bond lengths (Å) |         | Compound <b>1</b> | Bond angles (°) |          |
|-------------------|------------------|---------|-------------------|-----------------|----------|
|                   | Expt.            | Calc.   |                   | Expt.           | Calc.    |
| Sn(1)-C(1)        | 2.158(2)         | 2.16853 | Mo(1)-Sn(1)-C(1)  | 140.11(6)       | 135.0253 |
| Sn(1)-Mo(1)       | 2.7157(4)        | 2.72286 | H(1)-Sn(1)-C(1)   | 108.3(6)        | 100.3012 |
| Sn(1)-H(1)        | 1.93(2)          | 1.74977 | H(1)-Sn(1)-Mo(1)  | 111.4(6)        | 124.6165 |
| Mo(1)-C(38)       | 2.050(3)         | 2.04503 | Sn(1)-Mo(1)-C(40) | 176.48(9)       | 179.1233 |
| Mo(1)-C(39)       | 2.053(3)         | 2.05207 | C(38)-Mo(1)-C(40) | 91.25(12)       | 92.8569  |
| Mo(1)-C(40)       | 2.018(3)         | 2.00717 | Sn(1)-Mo(1)-C(38) | 86.08(8)        | 86.5436  |
| Mo(1)-C(41)       | 2.050(3)         | 2.04461 | Mo(1)-C(40)-O(40) | 179.5(4)        | 179.8013 |

**Table S2.** Scaled CO stretching frequencies (scaled by 0.986).

|                              |
|------------------------------|
| <b>1</b> (cm <sup>-1</sup> ) |
|------------------------------|

|      |
|------|
| 607  |
| 1762 |
| 1998 |
| 2013 |
| 2104 |

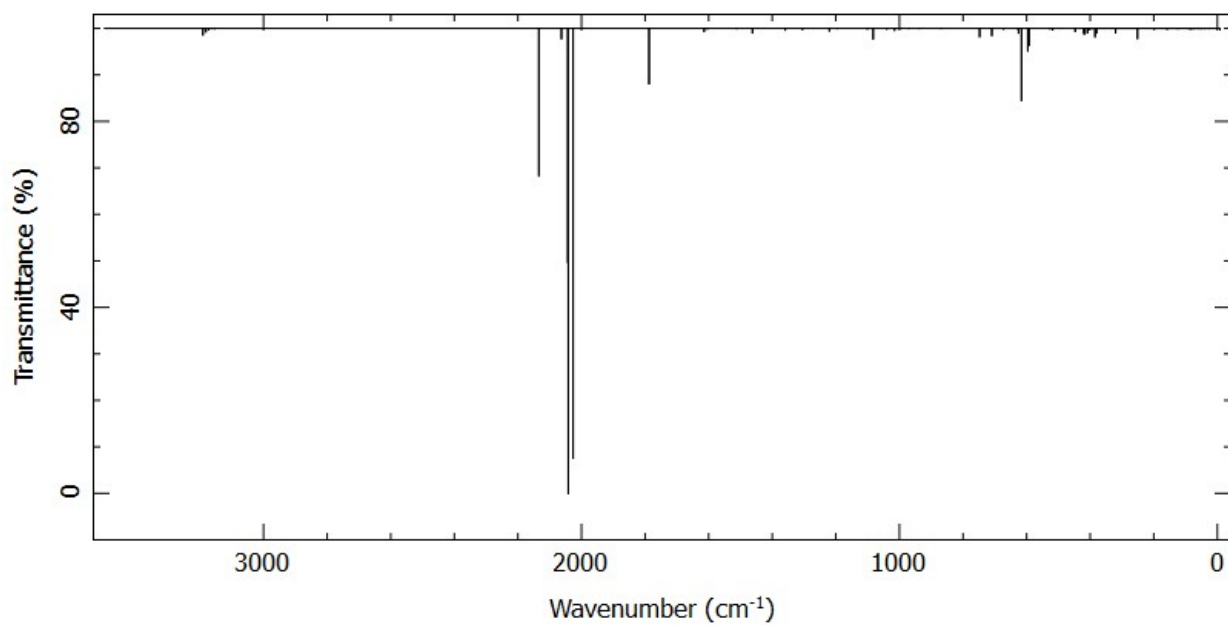

**Figure S1.** Calculated IR spectrum of **1**.

**Table S3.** Selected X-ray Crystallographic data for **1-3**.

| Compound          | <b>1</b>                                            | <b>2</b>                                            | <b>2</b>                                            |
|-------------------|-----------------------------------------------------|-----------------------------------------------------|-----------------------------------------------------|
| Empirical formula | C <sub>41</sub> H <sub>50</sub> MoO <sub>5</sub> Sn | C <sub>39</sub> H <sub>46</sub> MoO <sub>6</sub> Sn | C <sub>42</sub> H <sub>50</sub> MoO <sub>7</sub> Sn |
| Formula weight    | 837.44                                              | 825.39                                              | 881.45                                              |
| Temperature       | 90(2) K                                             | 90(2) K                                             | 90(2) K                                             |
| Wavelength        | 0.71073 Å                                           | 0.71073 Å                                           | 0.71073 Å                                           |
| Crystal system    | Triclinic                                           | Monoclinic                                          | Monoclinic                                          |

|                                              |                              |                              |                              |
|----------------------------------------------|------------------------------|------------------------------|------------------------------|
| Space group                                  | P-1                          | P2 <sub>1</sub> /c           | P2 <sub>1</sub> /m           |
| Crystal color and habit                      | Yellow block                 | Yellow plate                 | Colorless block              |
| a(Å)                                         | 10.0036(9)                   | 14.7682(5)                   | 8.6205(6)                    |
| b(Å)                                         | 13.2565(12)                  | 10.7848(4)                   | 18.6744(13)                  |
| c(Å)                                         | 15.0972(13)                  | 23.6781(10)                  | 12.8381(9)                   |
| α(°)                                         | 94.4823(14)                  | 90                           | 90                           |
| β(°)                                         | 92.9268(14)                  | 95.0100(10)                  | 90.8178(10)                  |
| γ(°)                                         | 96.3788(14)                  | 90                           | 90                           |
| Density (calculated)<br>(Mg/m <sup>3</sup> ) | 1.405                        | 1.459                        | 1.417                        |
| F(000)                                       | 856                          | 1680                         | 900                          |
| Crystal size(mm <sup>3</sup> )               | 0.522 x 0.368 x 0.354        | 0.334 x 0.288 x 0.285        | 0.476 x 0.456 x 0.268        |
| θ range(°)                                   | 1.972 to 27.487°             | 2.076 to 25.249°             | 1.925 to 30.631°             |
| Reflections collected                        | 17915                        | 16327                        | 24632                        |
| Independent reflections                      | 9055<br>[R(int) = 0.0163]    | 6802<br>[R(int) = 0.0549]    | 6555<br>[R(int) = 0.0281]    |
| Observed reflections<br>(I > 2σ(I))          | 7878                         | 4769                         | 5706                         |
| Completeness to<br>2θ= 25.242°               | 99.9 %                       | 100.0 %                      | 100.0 %                      |
| Goodness-of-fit on F <sup>2</sup>            | 1.045                        | 1.018                        | 1.078                        |
| Final R indices<br>(I>2σ(I))                 | R1 = 0.0313,<br>wR2 = 0.0794 | R1 = 0.0417,<br>wR2 = 0.0829 | R1 = 0.0248,<br>wR2 = 0.0607 |
| R indices (all data)                         | R1 = 0.0368,                 | R1 = 0.0702,                 | R1 = 0.0313,                 |

|  |              |              |              |
|--|--------------|--------------|--------------|
|  | wR2 = 0.0817 | wR2 = 0.0954 | wR2 = 0.0642 |
|--|--------------|--------------|--------------|

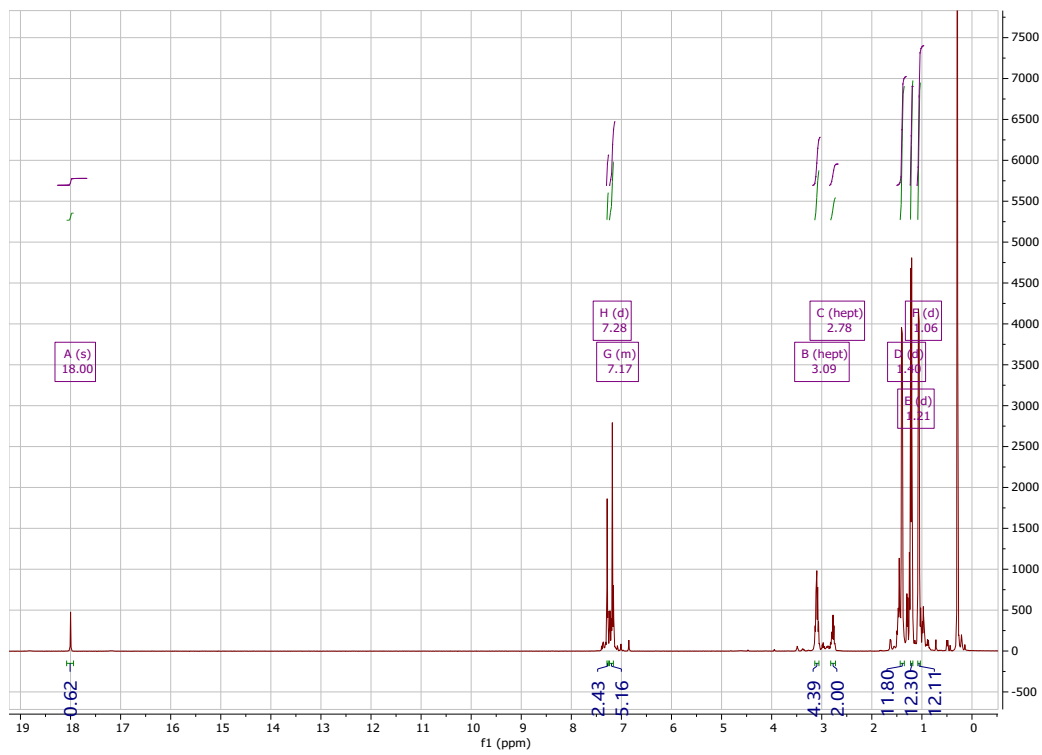

Figure S2. <sup>1</sup>H NMR spectrum of **1** in C<sub>6</sub>D<sub>6</sub> at 298K.

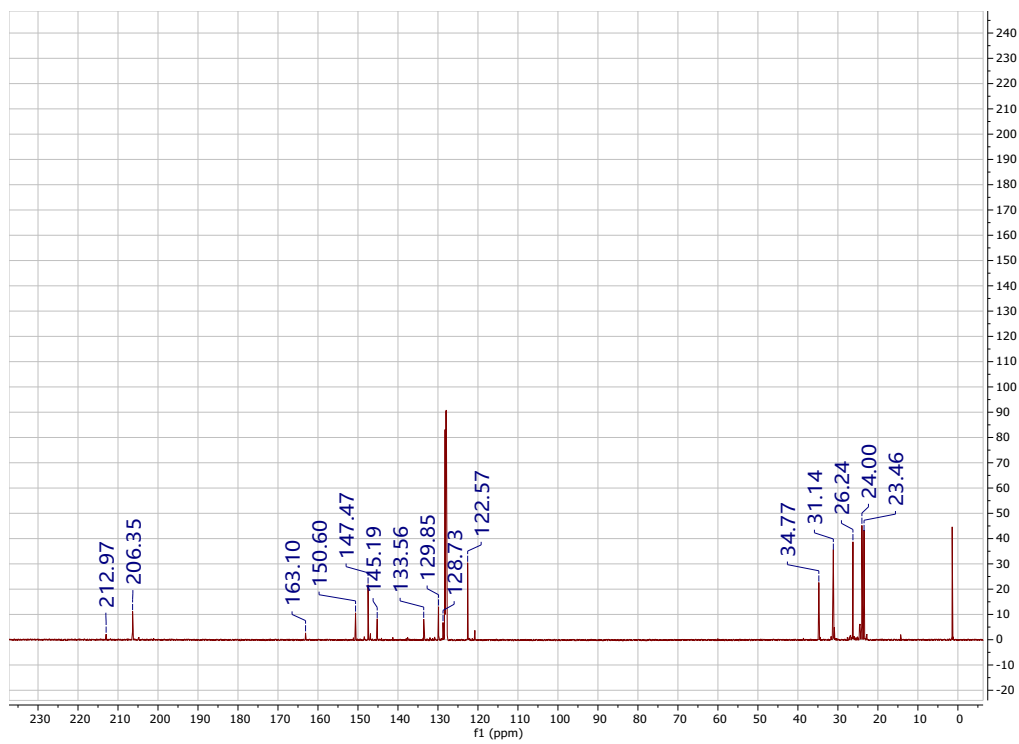

**Figure S3.**  $^{13}\text{C}\{^1\text{H}\}$  NMR spectrum of **1** in  $\text{C}_6\text{D}_6$  at 298K.

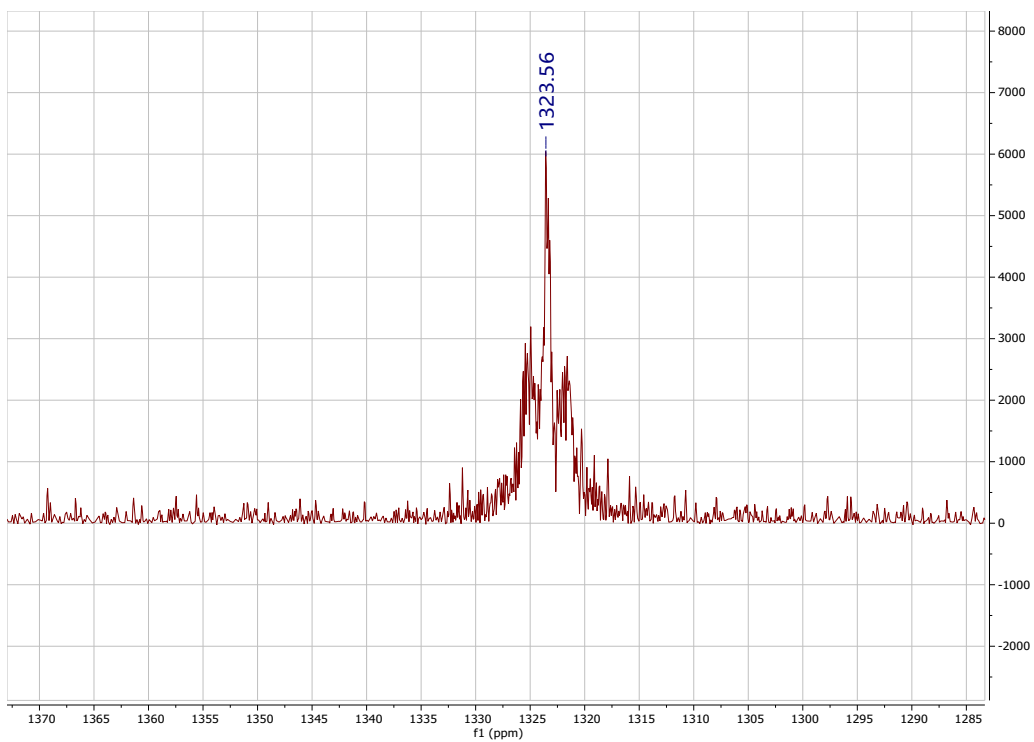

**Figure S4.**  $^{119}\text{Sn}\{^1\text{H}\}$  NMR spectrum of **1** in  $\text{C}_6\text{D}_6$  at 298K.

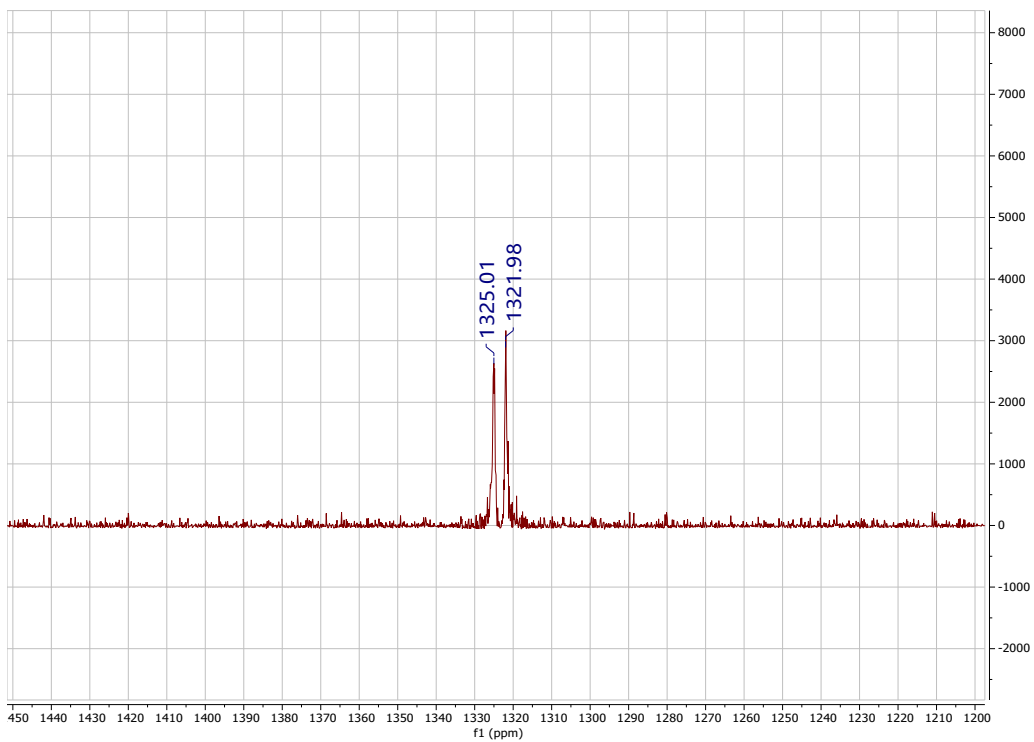

**Figure S5.**  $^{119}\text{Sn}$  NMR spectrum of **1** in  $\text{C}_6\text{D}_6$  at 298K.

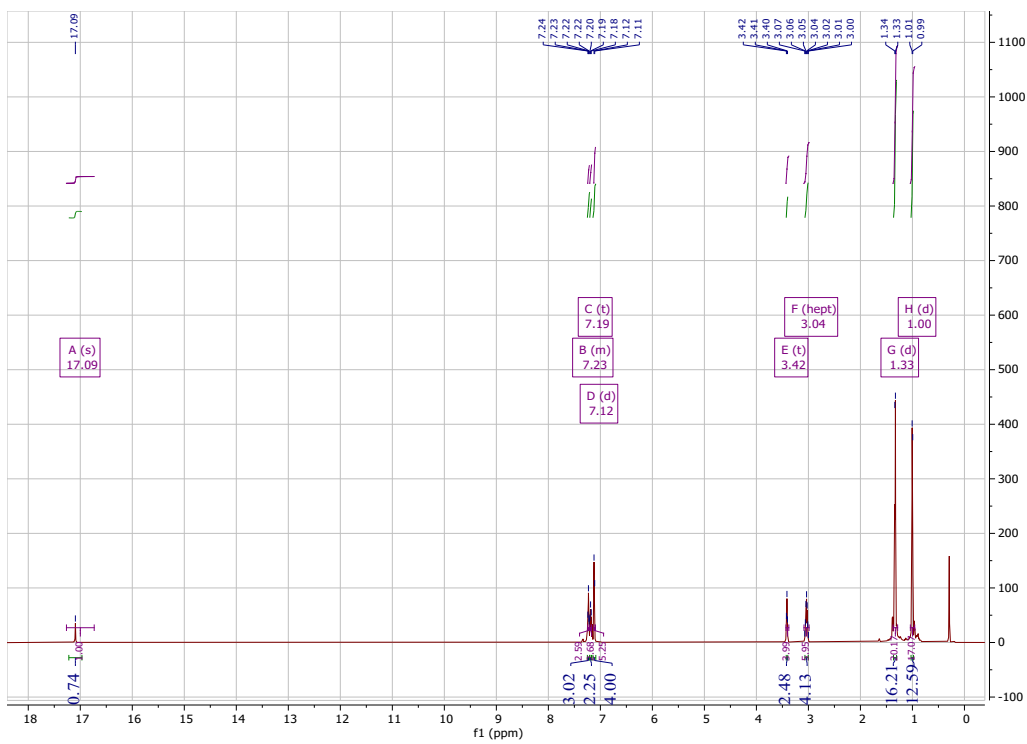

Figure S6.  $^1\text{H}$  NMR spectrum of **2** in  $\text{C}_6\text{D}_6$  at 298K.

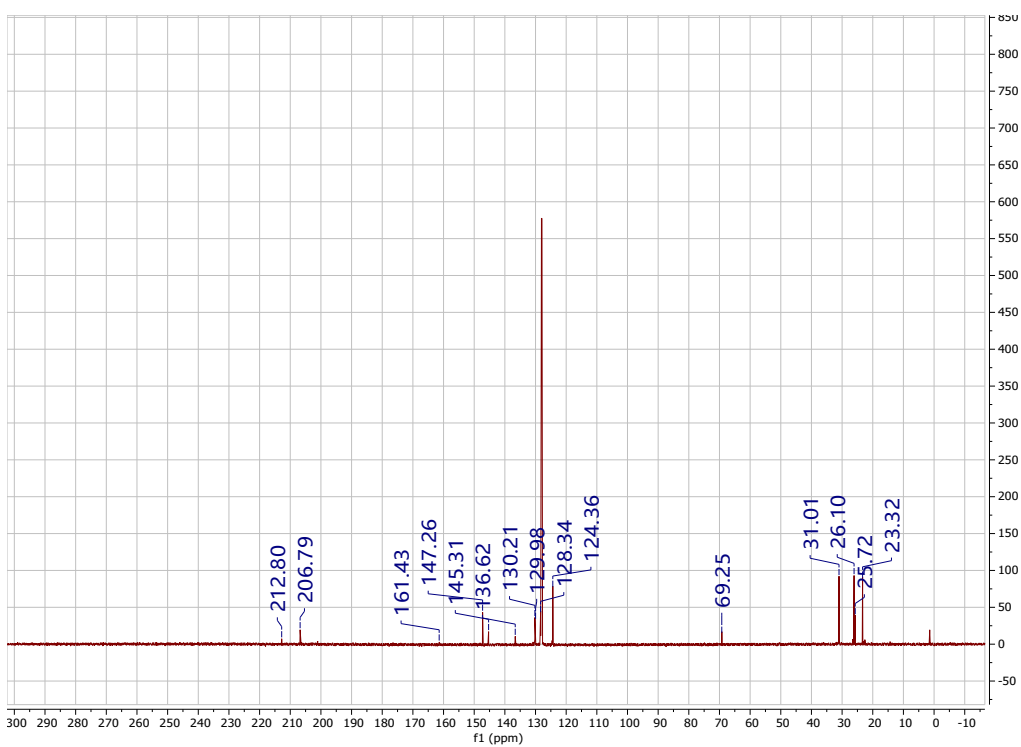

Figure S7.  $^{13}\text{C}\{^1\text{H}\}$  NMR spectrum of **2** in  $\text{C}_6\text{D}_6$  at 298K.



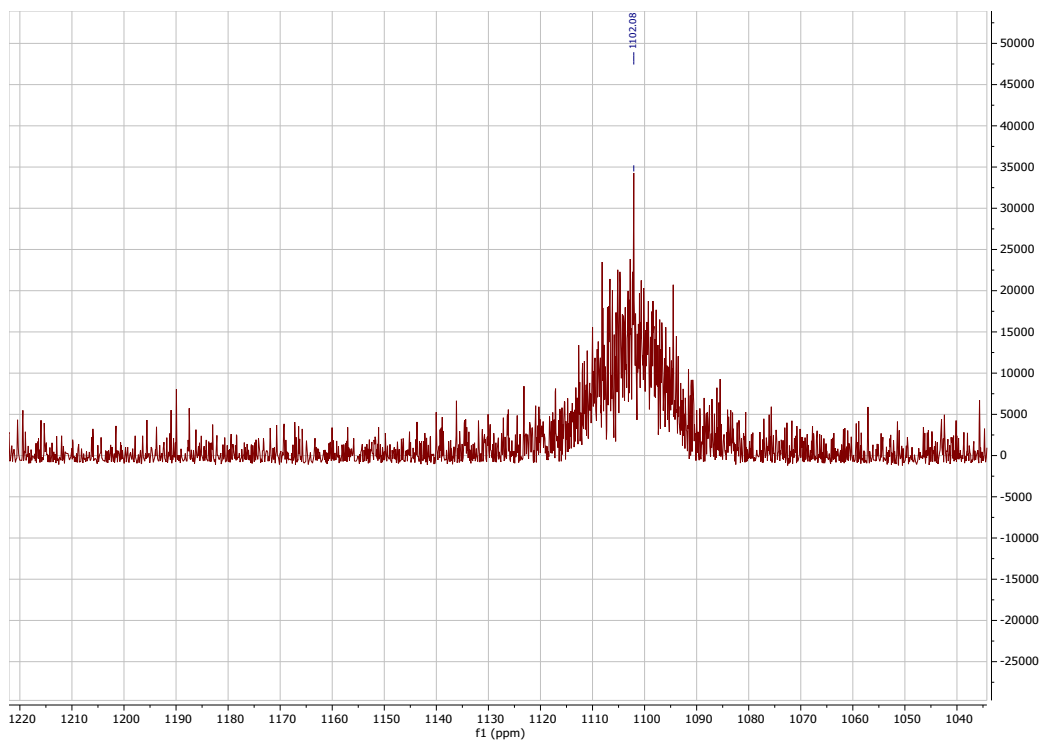

Figure S8.  $^{119}\text{Sn}\{^1\text{H}\}$  NMR spectrum of **2** in  $\text{C}_6\text{D}_6$  at 298K.

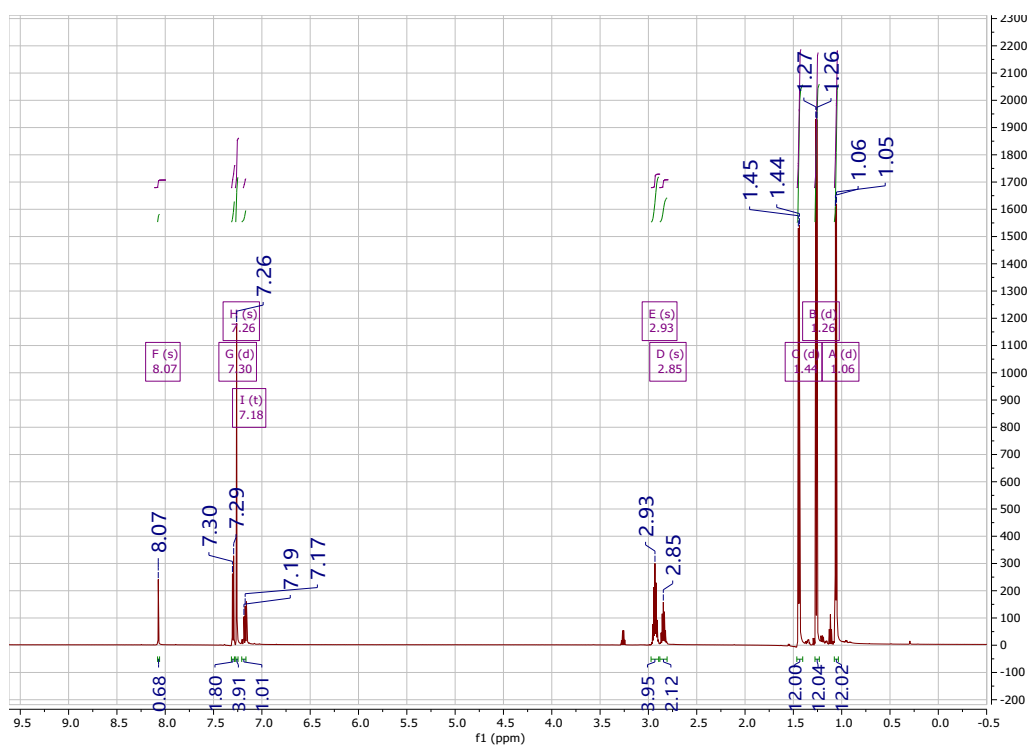

Figure S9.  $^1\text{H}$  NMR spectrum of **3** in  $\text{C}_6\text{D}_6$  at 298K.

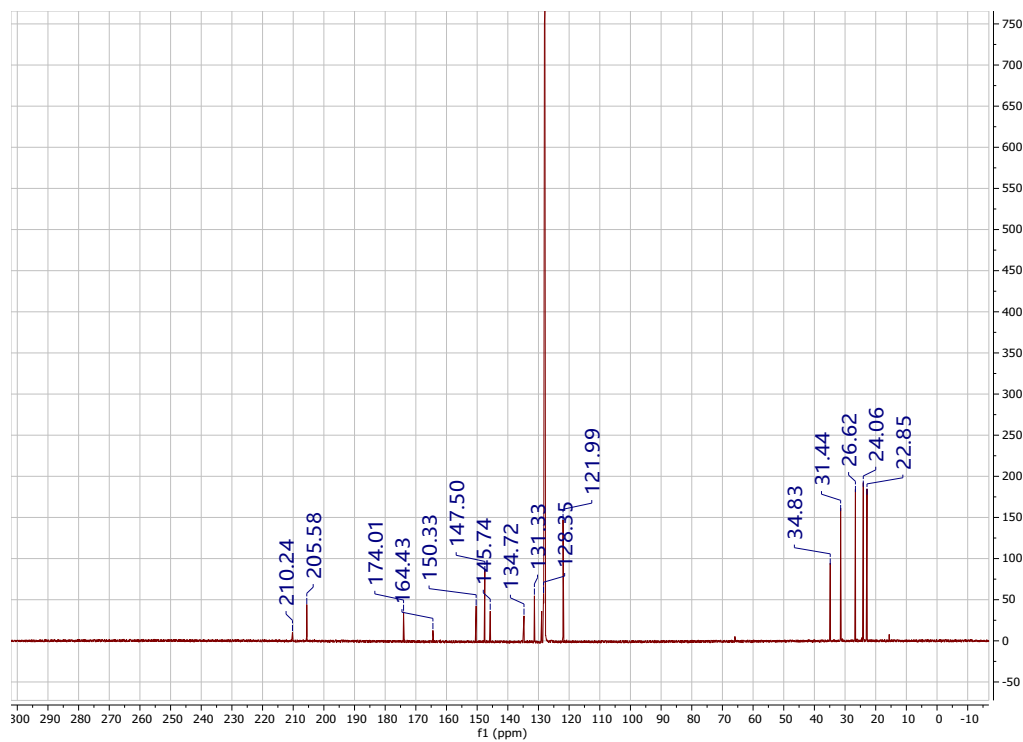

**Figure S10.**  $^{13}\text{C}\{^1\text{H}\}$  NMR spectrum of **3** in  $\text{C}_6\text{D}_6$  at 298K.

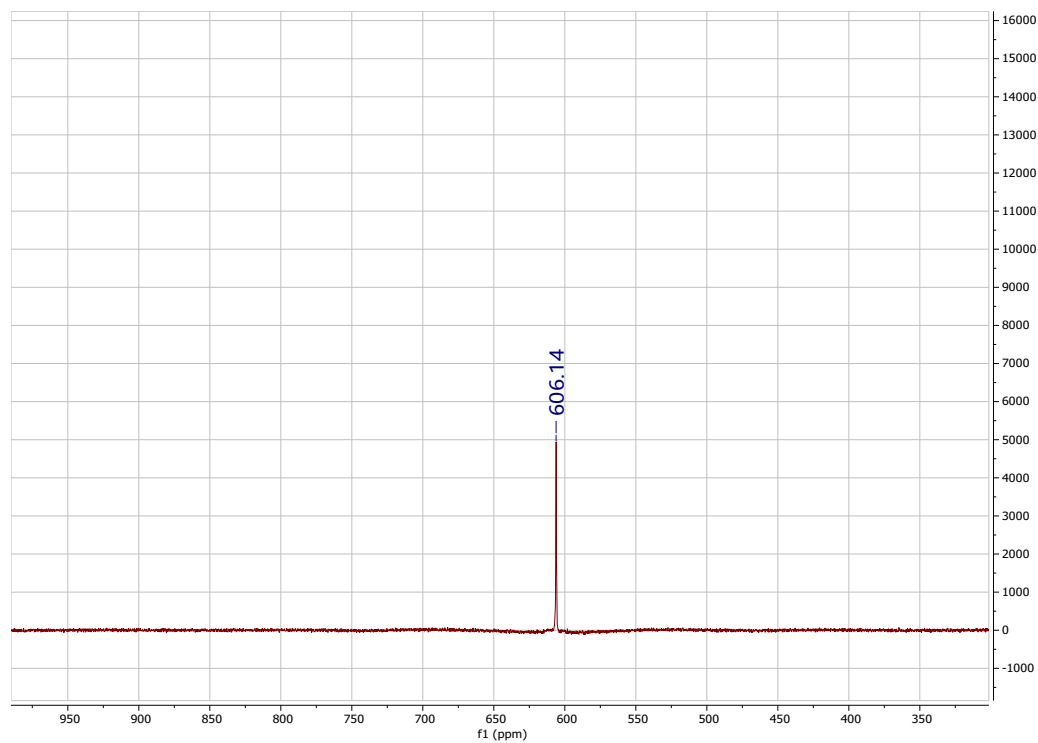

**Figure S11.**  $^{119}\text{Sn}\{^1\text{H}\}$  NMR spectrum of **3** in  $\text{C}_6\text{D}_6$  at 298K.

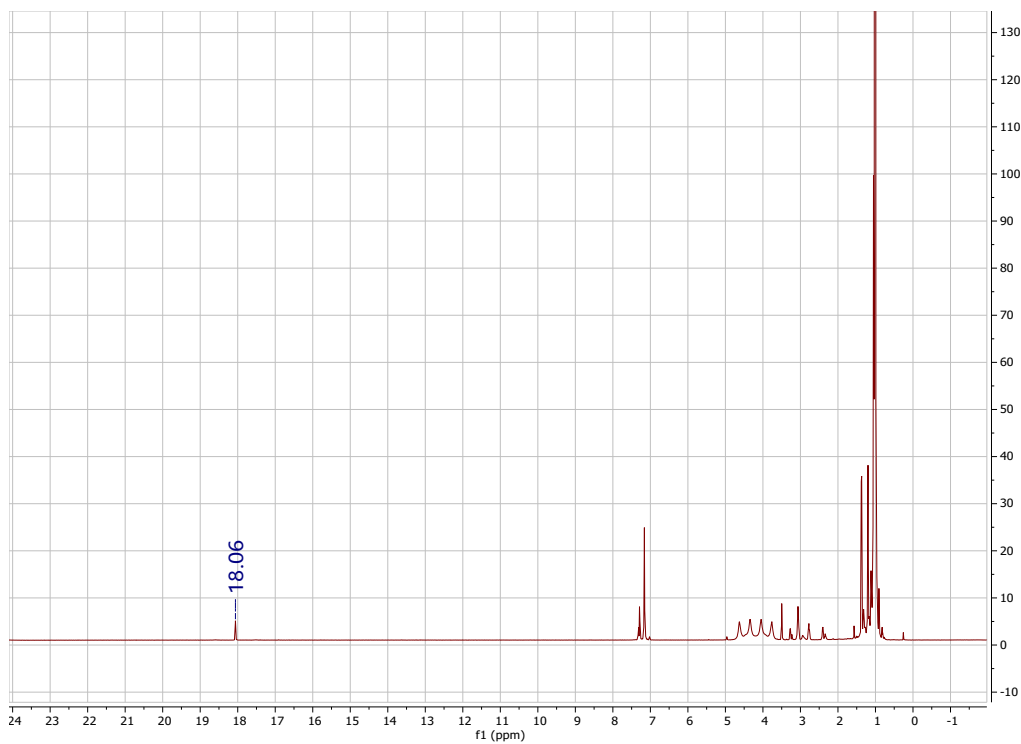

**Figure S12.**  $^1\text{H}$  NMR spectrum of **3** with HBpin (3 hours after mixing) in  $\text{C}_6\text{D}_6$  at 298K.

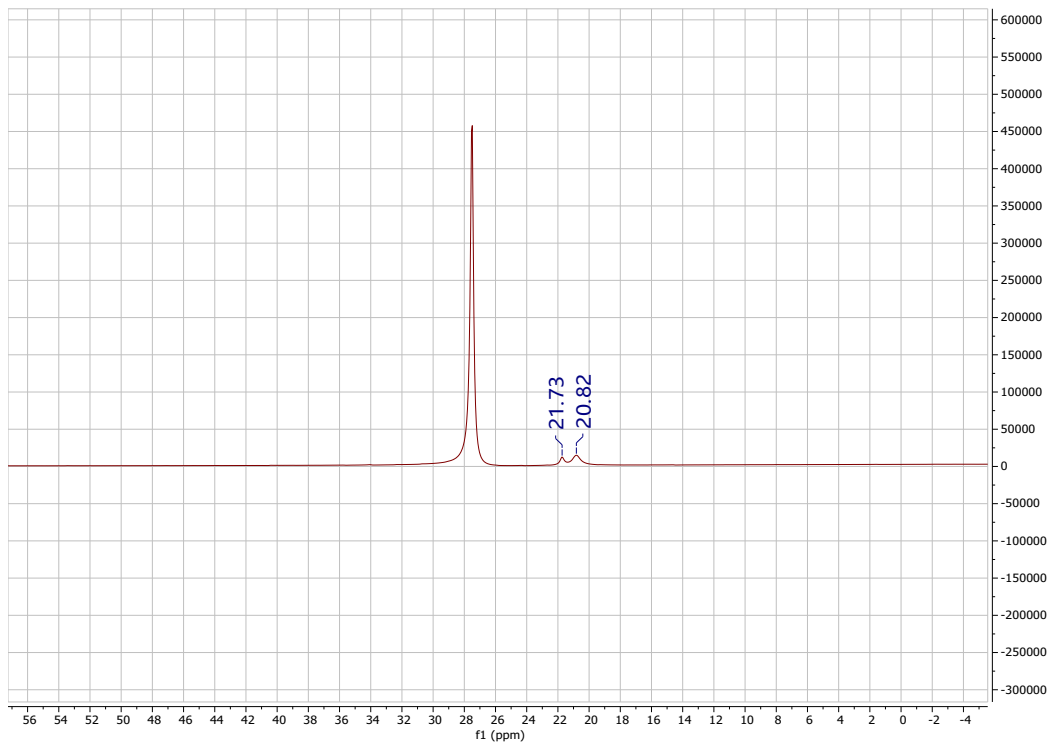

**Figure S13.**  $^{11}\text{B}\{^1\text{H}\}$  NMR spectrum of **3** with HBpin (3 hours after mixing) in  $\text{C}_6\text{D}_6$  at 298K.

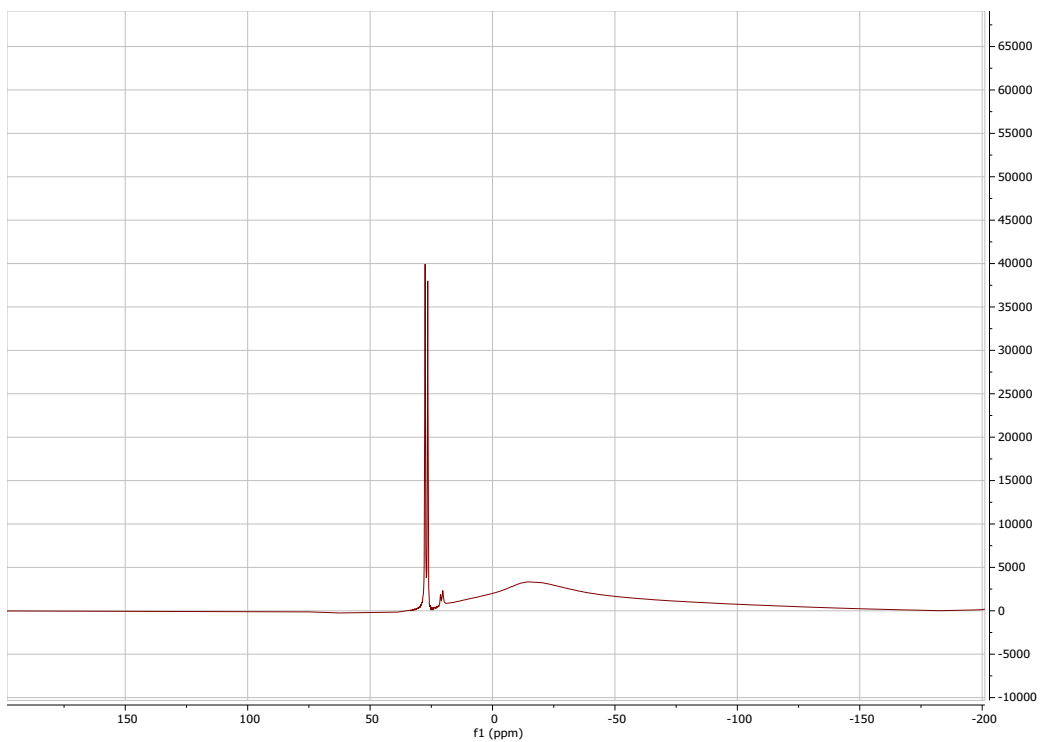

**Figure S14.**  $^{11}\text{B}$  NMR spectrum of **3** with HBpin (3 hours after mixing) in  $\text{C}_6\text{D}_6$  at 298K.

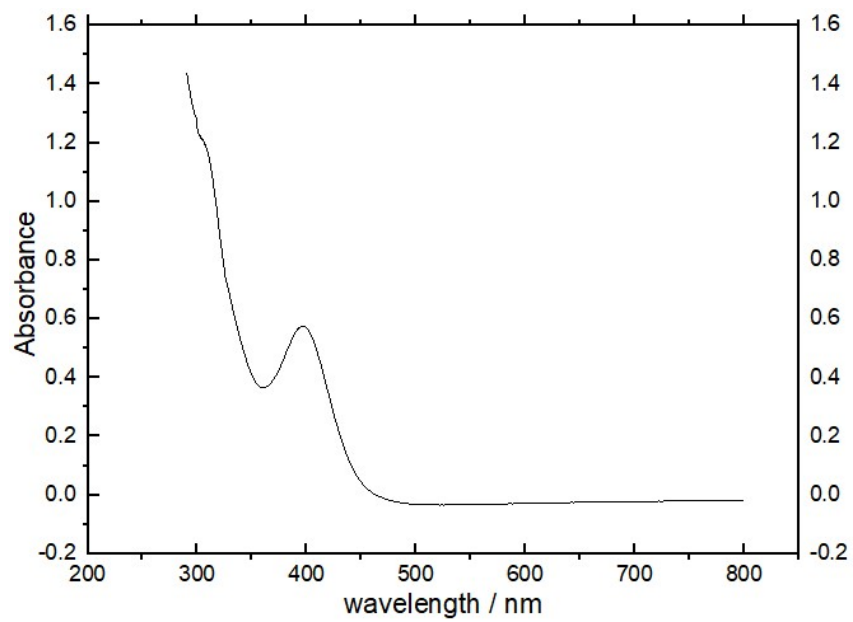

**Figure S15.** UV-vis spectrum of **1** in hexanes ( $2.3 \times 10^{-4}$  M) at 298K.

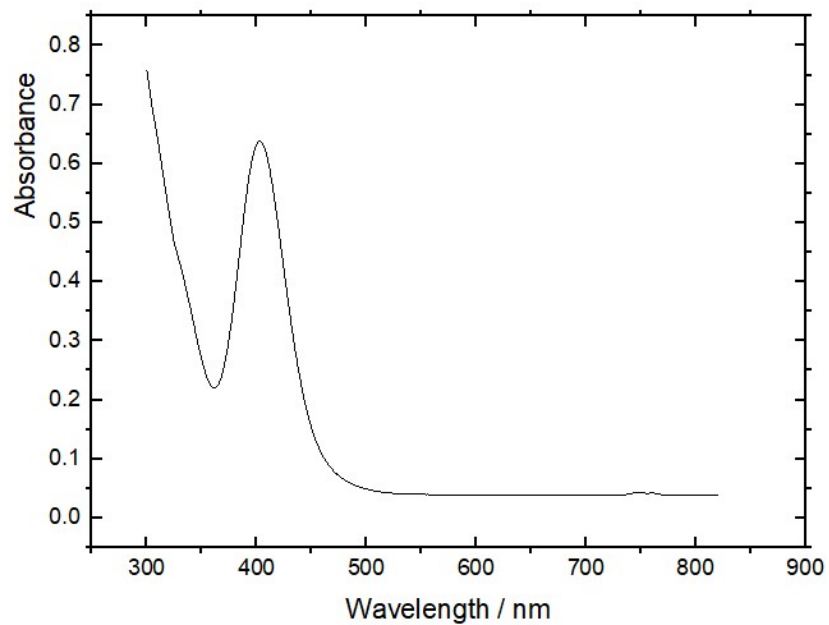

**Figure S16.** UV-vis spectrum of **2** in hexanes ( $6.0 \times 10^{-5}$  M) at 298K.

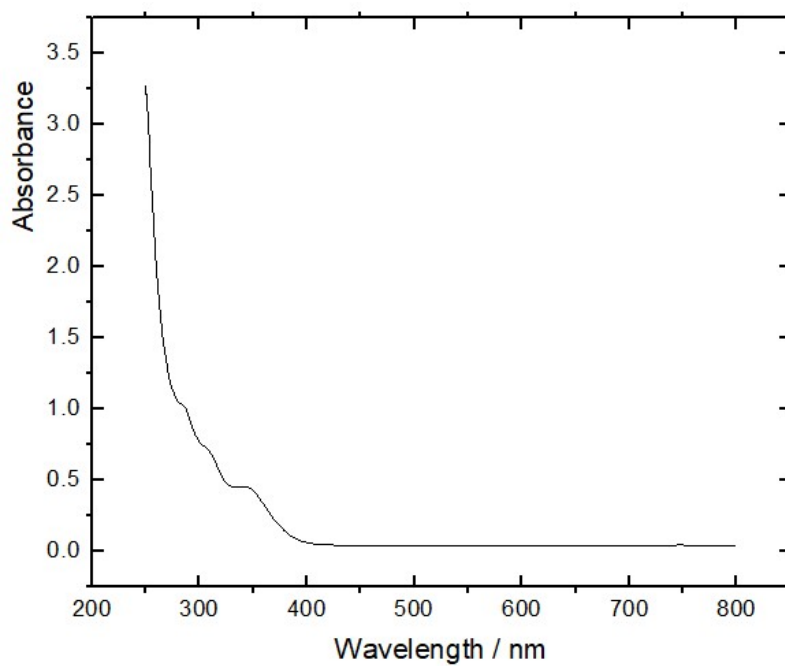

**Figure S17.** UV-vis spectrum of **3** in hexanes ( $5.4 \times 10^{-5}$  M) at 298K.

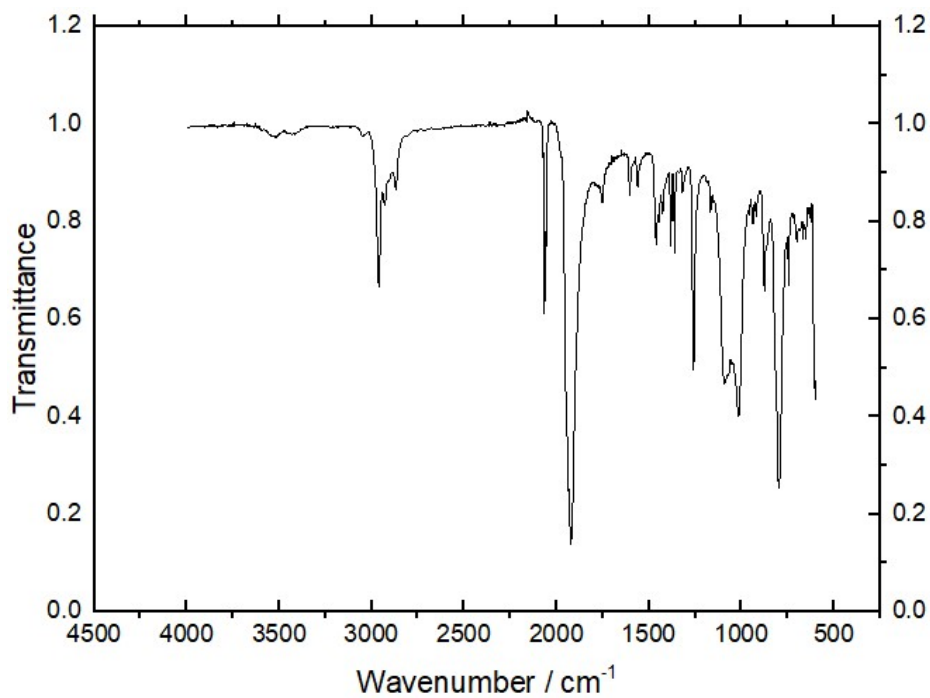

**Figure S18.** ATR-FTIR spectrum of **1** at 298K.

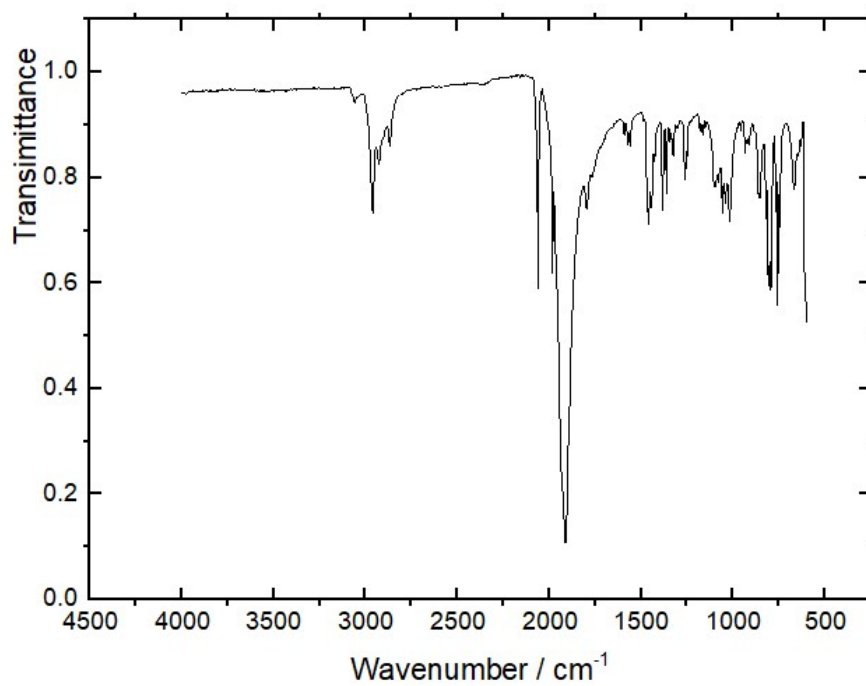

**Figure S19.** ATR-FTIR spectrum of **2** at 298K.

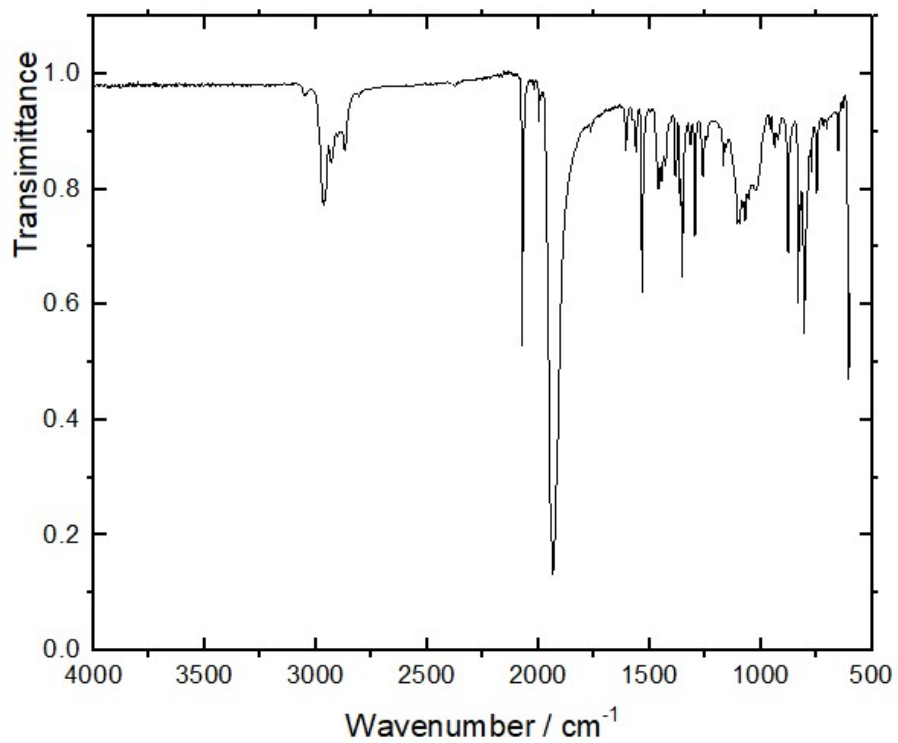

**Figure S20.** ATR-FTIR spectrum of **3** at 298K.

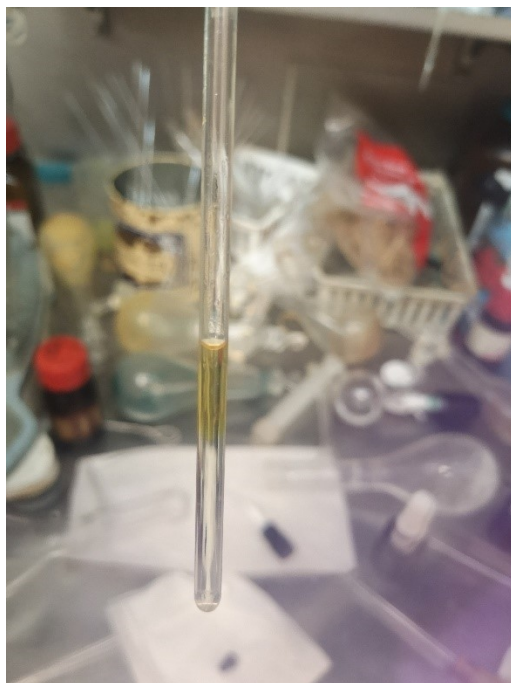

**Figure S21.** Photo of addition HBpin into **3** in  $C_6D_6$  at 298K.

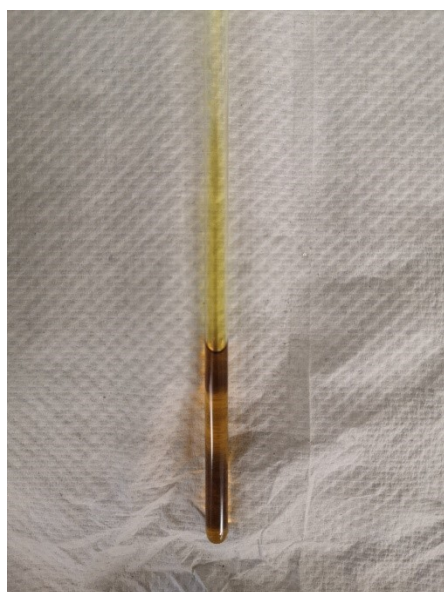

**Figure S22.** Photo of addition HBpin into **3** (3 hours after) in  $C_6D_6$  at 298K.



## References

1. A. D. Becke, *J. Chem. Phys.*, 1993, **98**, 1372-1377.
2. C. Lee, W. Yang and R. G. Parr, *Phys. Rev. B*, 1988, **37**, 785-789.
3. S. H. Vosko, L. Wilk and M. Nusair, *Can. J. Phys.*, 1980, **58**, 1200-1211.
4. P. J. Stephens, F. J. Devlin, C. F. Chabalowski and M. J. Frisch, *J. Phys. Chem.*, 1994, **98**, 11623-11627.
5. F. Weigend and R. Ahlrichs, *Phys. Chem Chem. Phys.*, 2005, **7**, 3297-3305.
6. B. Metz, H. Stoll and M. Dolg, *J. Chem. Phys.*, 2000, **113**, 2563-2569.
7. S. Grimme, J. Antony, S. Ehrlich and H. Krieg, *J. Chem. Phys.*, 2010, **132**, 154104.
8. S. Grimme, S. Ehrlich and L. Goerigk, *J. Comput. Chem.*, 2011, **32**, 1456-1465.
9. F. Weigend, *Phys. Chem Chem. Phys.*, 2006, **8**, 1057-1065.
10. A. Hellweg, C. Hättig, S. Höfener and W. Klopper, *Theor. Chem. Acc.*, 2007, **117**, 587-597.
11. F. Neese, *WIREs Comput. Mol. Sci.*, 2012, **2**, 73-78.
